# Supplementary material
Source: Springer Nature journal article supplement (https://www.springermedizin.de/resource/supplementary/13014_2010_529_MOESM3_ESM.pdf/9633640)

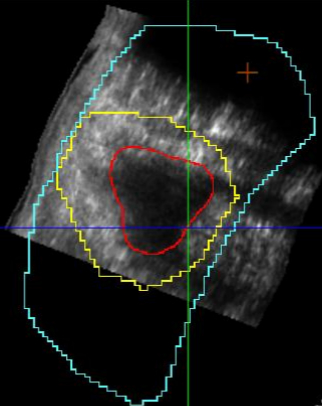

Slice: 95 / 254 (1.9 mm SUP)

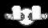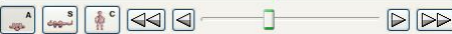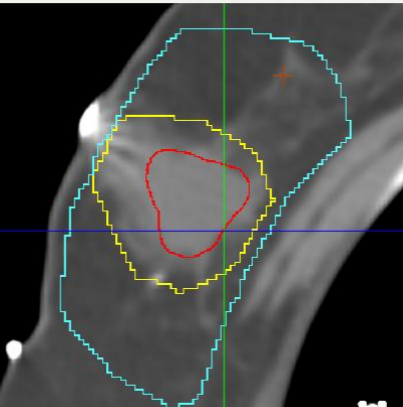

Slice: 95 / 254 (1.9 mm SUP)

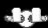

Supplement: MOESM3 [file 9633640]
